# Supplementary material for: Single-Dose SDA-Rich Echium Oil Increases Plasma EPA, DPAn3, and DHA Concentrations
Source: PubMed Central journal article supplement (PMC6835614; doi:10.3390/nu11102346), 2019-10-02
Supplement: nutrients-11-02346-s001.pdf [file nutrients-11-02346-s001.pdf]

## Supplementary Information

### Single-dose SDA-rich Echium oil increases plasma EPA, DPAn3 and DHA concentrations

Supplementary Information on Recruitment, screening and selection of participants  
2 Supplementary tables (table S1-S2)

#### Recruitment, screening and selection of participants

Participants were recruited from the general population in Hannover, Germany by advertisements. Subjects were pre-selected via screening questionnaires according to the following inclusion criteria: Male sex, age between 20 and 40 years, body mass index (BMI) between 20 and 27 kg/m<sup>2</sup>, mixed diet with low meat and fish consumption. Exclusion criteria were defined as followed: Smoking, serum triglyceride (TG) levels  $\geq 150$  mg/dl ( $\geq 1.7$  mmol/l); serum total cholesterol levels  $\geq 200$  mg/dl ( $\geq 5.2$  mmol/l); a relative amount of  $\Sigma$ EPA+DHA in red blood cells  $\leq 3$  and  $\geq 6\%$ , intake of fish (>2 times per week) as well as addiction to alcohol, drugs and/or medications and diseases: chronic diseases (e.g. malignant tumors, manifest cardiovascular disease, insulin-dependent type 1 and 2 diabetes, severe renal or liver diseases); chronic gastrointestinal disorders (especially small intestine, pancreas, liver) as well as prior gastrointestinal surgical procedures (e.g. gastrectomy); hormonal disorders (e.g. Cushing's syndrome and untreated hyperthyroidism); uncontrolled hypertension; blood coagulation disorders and intake of coagulation-inhibiting drugs; periodic intake of laxatives; intake of anti-inflammatory drugs (incl. acetylsalicylic acid); intake of lipid lowering drugs or supplements during the last 3 months before baseline examination. Inclusion and exclusion criteria were assessed via the screening questionnaire. The pre-selected subjects were invited to a screening examination to collect fasting blood for the analysis of serum lipid levels, liver enzymes and fatty acid patterns in blood cells. Serum triglyceride and total cholesterol were analyzed in the LADR laboratory (Laborärztliche Arbeitsgemeinschaft für Diagnostik und Rationalisierung e.V.), Hannover, Germany. For analysis of fatty acids in blood cells, the cell sediment after centrifugation and removal of plasma was reconstituted in PBS to the initial blood volume, transferred into 1.5 mL Eppendorf tubes and immediately frozen and stored at -80 °C until extraction and analysis. Lipids were extracted from 50  $\mu$ L diluted blood cells using MTBE/MeOH and concentrations of fatty acids were determined by means of gas chromatography with flame ionization detection (GC-FID) following (trans-)esterification to fatty acid methyl esters (FAMES) as described (1) using methyl pentacosanoate (C25:0 methyl ester) as internal standard (IS) for quantification.

**Table S1:** Daily energy, macronutrient and fatty acid intake of study participants during the whole period of the standardized nutrition (Day 1, 2 and 3) **(A)** and energy, macronutrient and fatty acid intake of meals at Day 1 of the standardized nutrition **(B)**.

| <b>A)</b>                               | <b>Day 1</b> |              | <b>Day 2</b> |              | <b>Day 3</b> |              |
|-----------------------------------------|--------------|--------------|--------------|--------------|--------------|--------------|
| <b>Portion size</b>                     | <b>small</b> | <b>large</b> | <b>small</b> | <b>large</b> | <b>small</b> | <b>large</b> |
| <b>Energy intake (kcal)<sup>a</sup></b> | 2924         | 3152         | 2687         | 2946         | 2907         | 3179         |
| <b>Carbohydrates (g)<sup>a</sup></b>    | 337          | 378          | 321          | 375          | 335          | 375          |
| <b>Protein (g)<sup>a</sup></b>          | 122          | 128          | 103          | 110          | 125          | 136          |
| <b>Total fat intake (g)<sup>a</sup></b> | 82.0         | 82.3         | 106          | 108          | 85.33        | 85.32        |
| <b>SFA (g)<sup>a</sup></b>              | 37.06        | 35.31        | 40.88        | 38.55        | 38.50        | 37.34        |
| <b>MUFA (g)<sup>a</sup></b>             | 17.49        | 16.64        | 20.87        | 20.06        | 18.05        | 17.67        |
| <b>PUFA (g)<sup>a</sup></b>             | 3.98         | 4.00         | 10.20        | 10.16        | 4.86         | 5.32         |
| <b>LA (g)<sup>b</sup></b>               | 3.25         | 3.27         | 9.49         | 9.45         | 4.00         | 4.36         |
| <b>ALA (g)<sup>b</sup></b>              | 0.53         | 0.52         | 0.51         | 0.49         | 0.67         | 0.74         |
| <b>ARA (g)<sup>b</sup></b>              | 0.10         | 0.11         | 0.12         | 0.12         | 0.11         | 0.11         |
| <b>EPA (g)<sup>b</sup></b>              | 0.03         | 0.03         | 0.03         | 0.03         | 0.03         | 0.03         |
| <b>DPAn3 (g)<sup>b</sup></b>            | < 0.01       | 0.02         | < 0.01       | 0.02         | 0.01         | 0.02         |
| <b>DHA (g)<sup>b</sup></b>              | < 0.01       | < 0.01       | < 0.01       | < 0.01       | < 0.01       | < 0.01       |

Levels are shown at day 1, 2 and 3 of standardized nutrition for small and large portion size.

| <b>B)</b>                               | <b>Breakfast</b>     |                      | <b>Lunch</b> |              | <b>Snack</b> |              | <b>Dinner</b> |              |
|-----------------------------------------|----------------------|----------------------|--------------|--------------|--------------|--------------|---------------|--------------|
| <b>Portion size</b>                     | <b>small / large</b> | <b>small / large</b> | <b>small</b> | <b>large</b> | <b>small</b> | <b>large</b> | <b>small</b>  | <b>large</b> |
| <b>Energy intake (kcal)<sup>a</sup></b> | 900                  | 919                  | 223          | 319          | 882          | 1014         |               |              |
| <b>Carbohydrates (g)<sup>a</sup></b>    | 95.9                 | 125                  | 33.3         | 48.1         | 83.3         | 109          |               |              |
| <b>Protein (g)<sup>a</sup></b>          | 34.8                 | 37.7                 | 8.00         | 10.0         | 41.2         | 45.3         |               |              |
| <b>Total fat intake (g)<sup>a</sup></b> | 36.6                 | 6.80                 | 3.78         | 4.10         | 34.9         | 35.1         |               |              |
| <b>SFA (g)<sup>a</sup></b>              | 17.82                | 2.71                 |              | 2.16         | 14.37        | 12.62        |               |              |
| <b>MUFA (g)<sup>a</sup></b>             | 8.68                 | 1.24                 |              | 1.07         | 6.49         | 5.64         |               |              |
| <b>PUFA (g)<sup>a</sup></b>             | 1.86                 | 0.33                 |              | 0.12         | 1.67         | 1.69         |               |              |
| <b>LA (g)<sup>b</sup></b>               | 1.54                 | 0.24                 |              | 0.09         | 1.38         | 1.40         |               |              |
| <b>ALA (g)<sup>b</sup></b>              | 0.22                 | 0.07                 |              | 0.02         | 0.21         | 0.20         |               |              |
| <b>ARA (g)<sup>b</sup></b>              | 0.05                 | 0.01                 |              | < 0.01       | 0.04         | 0.04         |               |              |
| <b>EPA (g)<sup>b</sup></b>              | 0.02                 | < 0.01               |              | < 0.01       | 0.01         | 0.01         |               |              |
| <b>DPAn3 (g)<sup>b</sup></b>            | < 0.01               | < 0.01               |              | < 0.01       | < 0.01       | 0.01         |               |              |
| <b>DHA (g)<sup>b</sup></b>              | < 0.01               | < 0.01               |              | < 0.01       | < 0.01       | < 0.01       |               |              |

Levels are shown for breakfast, lunch, snack and dinner of standardized nutrition for small and large portion size.

ARA: arachidonic acid; ALA:  $\alpha$ -linolenic acid; EPA: eicosapentaenoic acid; DHA: docosahexaenoic acid; DPAn3: docosapentaenoic acid; LA: linoleic acid; MUFA: monounsaturated fatty acids; PUFA: polyunsaturated fatty acids; SFA: saturated fatty acids.

<sup>a</sup> Energy, carbohydrate and protein intake were calculated with PRODI®

<sup>b</sup> Total fat, SFA, MUFA and PUFA LA, ALA, AA, EPA, DPAn3 and DHA intake were calculated from own analyses of meals that were provided by the Institute of Food Science and Human Nutrition

**Table S2:** Fatty acid profile in plasma after single-dose ingestion of echium oil.

|                |               | t0    |        | t2    |        | t4    |        | t6    |        | t8    |        | t24   |        | t48   |        | t72   |        |
|----------------|---------------|-------|--------|-------|--------|-------|--------|-------|--------|-------|--------|-------|--------|-------|--------|-------|--------|
|                |               | mean  | ± SD   | mean  | ± SD   | mean  | ± SD   | mean  | ± SD   | mean  | ± SD   | mean  | ± SD   | mean  | ± SD   | mean  | ± SD   |
| <b>C10:0</b>   | µg/mL         | <LLOQ |        | <LLOQ |        | <LLOQ |        | <LLOQ |        | <LLOQ |        | <LLOQ |        | <LLOQ |        | <LLOQ |        |
|                | % of total FA | <LLOQ |        | <LLOQ |        | <LLOQ |        | <LLOQ |        | <LLOQ |        | <LLOQ |        | <LLOQ |        | <LLOQ |        |
| <b>C11:0</b>   | µg/mL         | <LLOQ |        | <LLOQ |        | <LLOQ |        | <LLOQ |        | <LLOQ |        | <LLOQ |        | <LLOQ |        | <LLOQ |        |
|                | % of total FA | <LLOQ |        | <LLOQ |        | <LLOQ |        | <LLOQ |        | <LLOQ |        | <LLOQ |        | <LLOQ |        | <LLOQ |        |
| <b>C13:0</b>   | µg/mL         | <LLOQ |        | <LLOQ |        | <LLOQ |        | <LLOQ |        | <LLOQ |        | <LLOQ |        | <LLOQ |        | <LLOQ |        |
|                | % of total FA | <LLOQ |        | <LLOQ |        | <LLOQ |        | <LLOQ |        | <LLOQ |        | <LLOQ |        | <LLOQ |        | <LLOQ |        |
| <b>C14:0</b>   | µg/mL         | 34.4  | ± 14.3 | 48.0  | ± 28.0 | 52.6  | ± 27.5 | 67.0  | ± 40.0 | 39.0  | ± 17.1 | 26.7  | ± 14.1 | 33.9  | ± 11.5 | 32.1  | ± 12.8 |
|                | % of total FA | 1.16  | ± 0.29 | 1.55  | ± 0.53 | 1.54  | ± 0.40 | 1.74  | ± 0.56 | 1.19  | ± 0.31 | 1.01  | ± 0.41 | 1.51  | ± 0.31 | 1.09  | ± 0.29 |
| <b>C14:1n5</b> | µg/mL         | 1.82  | ± 0.90 | 2.82  | ± 1.84 | 3.43  | ± 1.92 | 4.88  | ± 3.19 | 1.88  | ± 0.96 | 1.14  | ± 0.70 | 1.63  | ± 0.74 | 1.70  | ± 1.09 |
|                | % of total FA | 0.06  | ± 0.02 | 0.09  | ± 0.04 | 0.10  | ± 0.03 | 0.12  | ± 0.05 | 0.06  | ± 0.02 | 0.04  | ± 0.02 | 0.07  | ± 0.02 | 0.05  | ± 0.03 |
| <b>C15:0</b>   | µg/mL         | 11.1  | ± 3.32 | 15.2  | ± 5.53 | 14.1  | ± 3.78 | 12.4  | ± 5.12 | 15.0  | ± 5.22 | 10.1  | ± 3.25 | 10.2  | ± 2.44 | 12.6  | ± 2.58 |
|                | % of total FA | 0.39  | ± 0.12 | 0.52  | ± 0.13 | 0.44  | ± 0.07 | 0.34  | ± 0.06 | 0.48  | ± 0.15 | 0.40  | ± 0.13 | 0.47  | ± 0.09 | 0.44  | ± 0.09 |
| <b>C15:1n5</b> | µg/mL         | <LLOQ |        | <LLOQ |        | <LLOQ |        | <LLOQ |        | <LLOQ |        | <LLOQ |        | <LLOQ |        | <LLOQ |        |
|                | % of total FA | <LLOQ |        | <LLOQ |        | <LLOQ |        | <LLOQ |        | <LLOQ |        | <LLOQ |        | <LLOQ |        | <LLOQ |        |
| <b>C16:0</b>   | µg/mL         | 656   | ± 188  | 650   | ± 242  | 731   | ± 266  | 835   | ± 272  | 682   | ± 185  | 569   | ± 156  | 502   | ± 115  | 630   | ± 141  |
|                | % of total FA | 22.5  | ± 1.64 | 21.9  | ± 1.95 | 22.1  | ± 2.04 | 23.0  | ± 1.49 | 21.4  | ± 1.58 | 21.9  | ± 1.67 | 22.8  | ± 1.05 | 21.7  | ± 1.38 |
| <b>C16:1n7</b> | µg/mL         | 73.2  | ± 34.2 | 68.3  | ± 32.7 | 68.7  | ± 31.5 | 72.1  | ± 30.2 | 60.1  | ± 22.7 | 52.2  | ± 22.6 | 48.4  | ± 17.2 | 58.2  | ± 17.5 |
|                | % of total FA | 2.44  | ± 0.66 | 2.25  | ± 0.60 | 2.04  | ± 0.53 | 1.96  | ± 0.51 | 1.86  | ± 0.52 | 1.96  | ± 0.52 | 2.16  | ± 0.45 | 1.99  | ± 0.36 |
| <b>C17:0</b>   | µg/mL         | 8.28  | ± 1.37 | 9.67  | ± 2.53 | 11.0  | ± 3.20 | 12.5  | ± 3.93 | 10.2  | ± 2.93 | 8.27  | ± 1.56 | 7.34  | ± 1.50 | 10.2  | ± 2.22 |
|                | % of total FA | 0.29  | ± 0.04 | 0.34  | ± 0.04 | 0.34  | ± 0.04 | 0.35  | ± 0.04 | 0.32  | ± 0.05 | 0.32  | ± 0.04 | 0.34  | ± 0.03 | 0.35  | ± 0.04 |
| <b>C17:1n8</b> | µg/mL         | <LLOQ |        | <LLOQ |        | <LLOQ |        | <LLOQ |        | <LLOQ |        | <LLOQ |        | <LLOQ |        | <LLOQ |        |
|                | % of total FA | <LLOQ |        | <LLOQ |        | <LLOQ |        | <LLOQ |        | <LLOQ |        | <LLOQ |        | <LLOQ |        | <LLOQ |        |
| <b>C18:0</b>   | µg/mL         | 200   | ± 46.3 | 214   | ± 58.7 | 250   | ± 73.8 | 273   | ± 73.0 | 247   | ± 52.4 | 198   | ± 43.1 | 160   | ± 32.8 | 229   | ± 41.2 |
|                | % of total FA | 6.94  | ± 0.58 | 7.45  | ± 0.53 | 7.70  | ± 0.57 | 7.64  | ± 0.52 | 7.88  | ± 0.67 | 7.68  | ± 0.68 | 7.30  | ± 0.49 | 7.96  | ± 0.46 |

|                      |             |             |             |             |             |             |             |             |
|----------------------|-------------|-------------|-------------|-------------|-------------|-------------|-------------|-------------|
| <b>C18:1n9</b> µg/mL | 701 ± 227   | 691 ± 259   | 763 ± 278   | 791 ± 277   | 620 ± 170   | 529 ± 144   | 423 ± 102   | 562 ± 106   |
| % of total FA        | 23.9 ± 2.66 | 23.4 ± 2.66 | 23.0 ± 2.44 | 21.6 ± 2.16 | 19.4 ± 1.87 | 20.3 ± 1.65 | 19.2 ± 1.94 | 19.5 ± 1.57 |
| <b>C18:1n7</b> µg/mL | 64.9 ± 21.2 | 67.1 ± 25.4 | 70.8 ± 24.4 | 74.2 ± 22.8 | 61.4 ± 15.6 | 53.9 ± 14.5 | 44.3 ± 11.1 | 60.7 ± 12.0 |
| % of total FA        | 2.22 ± 0.25 | 2.26 ± 0.26 | 2.15 ± 0.25 | 2.05 ± 0.23 | 1.93 ± 0.18 | 2.07 ± 0.14 | 2.01 ± 0.20 | 2.11 ± 0.17 |
| <b>C18:2n6</b> µg/mL | 706 ± 120   | 667 ± 146   | 731 ± 145   | 797 ± 155   | 790 ± 140   | 645 ± 117   | 572 ± 103   | 733 ± 121   |
| % of total FA        | 24.9 ± 3.28 | 23.6 ± 3.20 | 23.1 ± 3.08 | 22.8 ± 3.33 | 25.4 ± 2.80 | 25.3 ± 2.41 | 26.2 ± 1.94 | 25.6 ± 1.97 |
| <b>C18:3n6</b> µg/mL | 11.0 ± 4.69 | 20.9 ± 11.3 | 28.7 ± 19.5 | 51.7 ± 27.5 | 33.5 ± 12.3 | 19.8 ± 5.32 | 14.1 ± 4.28 | 14.5 ± 3.68 |
| % of total FA        | 0.37 ± 0.08 | 0.73 ± 0.38 | 0.89 ± 0.55 | 1.41 ± 0.53 | 1.06 ± 0.30 | 0.77 ± 0.11 | 0.63 ± 0.08 | 0.50 ± 0.06 |
| <b>C19:0</b> µg/mL   | 1.01 ± 0.32 | 1.10 ± 0.31 | 1.29 ± 0.31 | 1.55 ± 0.34 | 1.14 ± 0.31 | 0.95 ± 0.22 | 0.92 ± 0.26 | 1.31 ± 0.31 |
| % of total FA        | 0.04 ± 0.02 | 0.04 ± 0.01 | 0.04 ± 0.01 | 0.04 ± 0.01 | 0.04 ± 0.01 | 0.04 ± 0.01 | 0.04 ± 0.01 | 0.05 ± 0.01 |
| <b>C18:3n3</b> µg/mL | 15.2 ± 4.96 | 45.8 ± 30.5 | 72.2 ± 60.7 | 123 ± 69.4  | 72.1 ± 29.7 | 28.7 ± 8.77 | 14.7 ± 3.97 | 19.6 ± 5.70 |
| % of total FA        | 0.52 ± 0.07 | 1.61 ± 1.16 | 2.24 ± 1.79 | 3.34 ± 1.31 | 2.26 ± 0.65 | 1.11 ± 0.29 | 0.66 ± 0.09 | 0.68 ± 0.12 |
| <b>C18:4n3</b> µg/mL | <LLOQ       | 12.3 ± 11.6 | 21.2 ± 22.2 | 43.6 ± 29.4 | 19.1 ± 12.0 | 3.05 ± 1.17 | 1.18 ± 0.47 | 1.04 ± 0.52 |
| % of total FA        | <LLOQ       | 0.44 ± 0.45 | 0.66 ± 0.66 | 1.17 ± 0.60 | 0.59 ± 0.30 | 0.12 ± 0.05 | 0.05 ± 0.02 | 0.03 ± 0.02 |
| <b>C20:0</b> µg/mL   | 5.62 ± 1.04 | 5.77 ± 1.14 | 6.28 ± 1.41 | 6.63 ± 1.79 | 6.49 ± 1.34 | 6.04 ± 1.13 | 4.92 ± 0.94 | 7.37 ± 1.08 |
| % of total FA        | 0.20 ± 0.03 | 0.21 ± 0.04 | 0.20 ± 0.03 | 0.19 ± 0.03 | 0.21 ± 0.03 | 0.24 ± 0.03 | 0.23 ± 0.02 | 0.26 ± 0.03 |
| <b>C20:1n9</b> µg/mL | 7.17 ± 2.54 | 7.28 ± 2.14 | 7.12 ± 2.81 | 7.77 ± 3.25 | 6.01 ± 1.82 | 5.26 ± 1.35 | 4.03 ± 0.78 | 5.12 ± 1.31 |
| % of total FA        | 0.26 ± 0.10 | 0.25 ± 0.05 | 0.22 ± 0.05 | 0.21 ± 0.05 | 0.19 ± 0.05 | 0.21 ± 0.06 | 0.19 ± 0.04 | 0.18 ± 0.04 |
| <b>C20:2n6</b> µg/mL | 6.04 ± 1.69 | 6.13 ± 1.75 | 6.83 ± 1.81 | 6.59 ± 1.44 | 6.32 ± 1.07 | 5.42 ± 1.23 | 4.65 ± 1.08 | 6.31 ± 1.29 |
| % of total FA        | 0.21 ± 0.05 | 0.21 ± 0.04 | 0.21 ± 0.04 | 0.19 ± 0.03 | 0.20 ± 0.03 | 0.21 ± 0.03 | 0.21 ± 0.05 | 0.22 ± 0.04 |
| <b>C20:3n9</b> µg/mL | 4.93 ± 2.73 | 4.90 ± 2.76 | 5.41 ± 3.11 | 5.06 ± 2.57 | 5.45 ± 2.34 | 4.39 ± 2.24 | 3.42 ± 1.51 | 4.43 ± 1.67 |
| % of total FA        | 0.16 ± 0.06 | 0.16 ± 0.05 | 0.16 ± 0.05 | 0.14 ± 0.05 | 0.17 ± 0.06 | 0.16 ± 0.05 | 0.15 ± 0.04 | 0.15 ± 0.04 |
| <b>C20:3n6</b> µg/mL | 50.2 ± 12.4 | 48.7 ± 14.1 | 54.3 ± 14.1 | 55.0 ± 12.5 | 63.3 ± 11.8 | 60.6 ± 12.9 | 50.1 ± 10.4 | 70.1 ± 15.4 |
| % of total FA        | 1.75 ± 0.28 | 1.69 ± 0.24 | 1.70 ± 0.31 | 1.58 ± 0.32 | 2.05 ± 0.37 | 2.37 ± 0.39 | 2.30 ± 0.37 | 2.44 ± 0.39 |
| <b>C21:0</b> µg/mL   | <LLOQ       | <LLOQ       | <LLOQ       | <LLOQ       | <LLOQ       | <LLOQ       | <LLOQ       | <LLOQ       |
| % of total FA        | <LLOQ       | <LLOQ       | <LLOQ       | <LLOQ       | <LLOQ       | <LLOQ       | <LLOQ       | <LLOQ       |
| <b>C20:4n6</b> µg/mL | 182 ± 53.1  | 175 ± 62.8  | 194 ± 67.1  | 195 ± 59.7  | 225 ± 64.6  | 189 ± 59.5  | 159 ± 44.2  | 224 ± 55.7  |
| % of total FA        | 6.34 ± 1.39 | 6.11 ± 1.61 | 6.03 ± 1.58 | 5.49 ± 1.28 | 7.09 ± 1.39 | 7.30 ± 1.55 | 7.18 ± 1.20 | 7.73 ± 1.25 |
| <b>C20:3n3</b> µg/mL | <LLOQ       | <LLOQ       | 0.65 ± 0.18 | 0.99 ± 0.29 | 0.64 ± 0.23 | 0.68 ± 0.27 | <LLOQ       | <LLOQ       |

|                |               |             |              |             |             |             |             |             |             |
|----------------|---------------|-------------|--------------|-------------|-------------|-------------|-------------|-------------|-------------|
|                | % of total FA | <LLOQ       | <LLOQ        | 0.02 ± 0.01 | 0.03 ± 0.01 | 0.01 ± 0.01 | 0.02 ± 0.02 | <LLOQ       | <LLOQ       |
| <b>C20:4n3</b> | µg/mL         | 2.76 ± 1.36 | 3.41 ± 1.37  | 5.60 ± 2.52 | 9.39 ± 3.38 | 12.6 ± 3.95 | 8.86 ± 3.14 | 5.37 ± 1.97 | 6.44 ± 2.13 |
|                | % of total FA | 0.09 ± 0.03 | 0.12 ± 0.04  | 0.18 ± 0.10 | 0.27 ± 0.11 | 0.40 ± 0.09 | 0.34 ± 0.09 | 0.24 ± 0.07 | 0.22 ± 0.06 |
| <b>C20:5n3</b> | µg/mL         | 15.2 ± 6.57 | 15.2 ± 6.73  | 17.1 ± 7.88 | 18.2 ± 7.41 | 21.4 ± 8.19 | 22.5 ± 8.68 | 19.3 ± 7.39 | 24.8 ± 8.33 |
|                | % of total FA | 0.52 ± 0.18 | 0.52 ± 0.17  | 0.52 ± 0.15 | 0.51 ± 0.16 | 0.66 ± 0.21 | 0.86 ± 0.27 | 0.85 ± 0.25 | 0.85 ± 0.23 |
| <b>C22:0</b>   | µg/mL         | 19.1 ± 3.17 | 19.7 ± 3.20  | 19.2 ± 3.99 | 17.5 ± 3.35 | 23.5 ± 4.51 | 19.2 ± 3.42 | 16.4 ± 3.10 | 22.4 ± 3.10 |
|                | % of total FA | 0.68 ± 0.13 | 0.73 ± 0.24  | 0.62 ± 0.14 | 0.51 ± 0.11 | 0.76 ± 0.14 | 0.77 ± 0.16 | 0.75 ± 0.09 | 0.79 ± 0.09 |
| <b>C22:1n9</b> | µg/mL         | 2.27 ± 1.01 | 4.82 ± 3.05  | 3.30 ± 3.30 | 3.85 ± 1.47 | 4.14 ± 2.06 | 2.28 ± 0.64 | 2.81 ± 2.52 | 3.93 ± 2.37 |
|                | % of total FA | 0.08 ± 0.04 | 0.18 ± 0.13  | 0.11 ± 0.10 | 0.12 ± 0.06 | 0.14 ± 0.07 | 0.09 ± 0.03 | 0.13 ± 0.14 | 0.15 ± 0.10 |
| <b>C22:2n6</b> | µg/mL         | <LLOQ       | <LLOQ        | <LLOQ       | <LLOQ       | <LLOQ       | <LLOQ       | <LLOQ       | <LLOQ       |
|                | % of total FA | <LLOQ       | <LLOQ        | <LLOQ       | <LLOQ       | <LLOQ       | <LLOQ       | <LLOQ       | <LLOQ       |
| <b>C22:4n6</b> | µg/mL         | 7.25 ± 1.92 | 7.39 ± 2.15  | 8.40 ± 2.54 | 7.52 ± 1.86 | 8.90 ± 2.12 | 7.39 ± 1.82 | 6.10 ± 1.27 | 9.19 ± 1.58 |
|                | % of total FA | 0.25 ± 0.03 | 0.26 ± 0.04  | 0.26 ± 0.04 | 0.21 ± 0.03 | 0.28 ± 0.05 | 0.29 ± 0.03 | 0.28 ± 0.03 | 0.32 ± 0.03 |
| <b>C22:5n6</b> | µg/mL         | 3.96 ± 1.81 | 3.90 ± 2.20  | 4.61 ± 1.81 | 4.44 ± 1.63 | 4.99 ± 1.75 | 4.05 ± 1.70 | 3.14 ± 1.20 | 4.49 ± 2.04 |
|                | % of total FA | 0.13 ± 0.06 | 0.12 ± 0.07  | 0.14 ± 0.04 | 0.12 ± 0.03 | 0.16 ± 0.04 | 0.15 ± 0.04 | 0.14 ± 0.03 | 0.15 ± 0.05 |
| <b>C22:5n3</b> | µg/mL         | 16.4 ± 6.27 | 13.5 ± 6.22  | 18.6 ± 5.13 | 18.7 ± 5.04 | 21.7 ± 5.84 | 17.6 ± 4.63 | 15.9 ± 4.18 | 24.1 ± 4.89 |
|                | % of total FA | 0.56 ± 0.17 | 0.45 ± 0.15  | 0.59 ± 0.16 | 0.53 ± 0.11 | 0.69 ± 0.11 | 0.69 ± 0.15 | 0.72 ± 0.14 | 0.85 ± 0.15 |
| <b>C24:0</b>   | µg/mL         | 15.4 ± 2.85 | 14.14 ± 2.18 | 14.5 ± 3.04 | 13.1 ± 2.47 | 18.2 ± 4.03 | 16.0 ± 2.53 | 13.0 ± 2.12 | 18.0 ± 2.66 |
|                | % of total FA | 0.54 ± 0.08 | 0.52 ± 0.14  | 0.47 ± 0.10 | 0.38 ± 0.09 | 0.59 ± 0.10 | 0.63 ± 0.11 | 0.60 ± 0.09 | 0.63 ± 0.09 |
| <b>C22:6n3</b> | µg/mL         | 40.3 ± 12.4 | 39.8 ± 15.0  | 45.1 ± 16.4 | 42.7 ± 13.9 | 48.2 ± 15.1 | 39.4 ± 11.9 | 33.1 ± 9.84 | 48.7 ± 13.3 |
|                | % of total FA | 1.38 ± 0.21 | 1.36 ± 0.27  | 1.37 ± 0.21 | 1.18 ± 0.18 | 1.51 ± 0.23 | 1.51 ± 0.22 | 1.49 ± 0.21 | 1.67 ± 0.22 |
| <b>C24:1n9</b> | µg/mL         | 27.8 ± 4.57 | 26.6 ± 6.54  | 26.9 ± 6.26 | 26.6 ± 4.87 | 31.9 ± 7.29 | 30.1 ± 5.90 | 24.1 ± 4.31 | 35.8 ± 5.25 |
|                | % of total FA | 1.00 ± 0.22 | 0.95 ± 0.24  | 0.88 ± 0.25 | 0.77 ± 0.17 | 1.03 ± 0.21 | 1.19 ± 0.21 | 1.11 ± 0.15 | 1.26 ± 0.16 |
| <b>ΣFA</b>     | µg/mL         | 2890 ± 691  | 2910 ± 885   | 3256 ± 944  | 3598 ± 1021 | 3161 ± 700  | 2584 ± 575  | 2198 ± 455  | 2881 ± 526  |
|                | % of total FA | 100 ± 0.00  | 100 ± 0.00   | 100 ± 0.00  | 100 ± 0.00  | 100 ± 0.00  | 100 ± 0.00  | 100 ± 0.00  | 100 ± 0.00  |
| <b>ΣSFA</b>    | µg/mL         | 950 ± 249   | 978 ± 334    | 1100 ± 373  | 1238 ± 393  | 1043 ± 259  | 854 ± 212   | 748 ± 164   | 963 ± 199   |
|                | % of total FA | 32.7 ± 1.53 | 33.3 ± 1.70  | 33.4 ± 2.12 | 34.2 ± 1.58 | 32.8 ± 1.51 | 32.9 ± 1.53 | 34.0 ± 1.20 | 33.3 ± 1.35 |
| <b>ΣMUFA</b>   | µg/mL         | 878 ± 283   | 868 ± 320    | 943 ± 336   | 981 ± 334   | 785 ± 208   | 674 ± 183   | 548 ± 131   | 727 ± 136   |
|                | % of total FA | 30.0 ± 3.18 | 29.3 ± 3.05  | 28.5 ± 2.91 | 26.9 ± 2.53 | 24.6 ± 2.17 | 25.9 ± 2.01 | 24.9 ± 2.18 | 25.3 ± 1.82 |

|                       |             |             |             |             |             |             |             |             |
|-----------------------|-------------|-------------|-------------|-------------|-------------|-------------|-------------|-------------|
| <b>ΣPUFA</b> μg/mL    | 1062 ± 200  | 1064 ± 258  | 1213 ± 273  | 1379 ± 321  | 1333 ± 256  | 1056 ± 208  | 902 ± 177   | 1191 ± 210  |
| % of total FA         | 37.3 ± 3.79 | 37.4 ± 4.33 | 38.1 ± 4.32 | 39.0 ± 3.61 | 42.5 ± 2.73 | 41.2 ± 3.02 | 41.1 ± 1.80 | 41.4 ± 1.99 |
| <b>Σn3 PUFA</b> μg/mL | 90.4 ± 28.7 | 130 ± 54.1  | 180 ± 90.3  | 257 ± 114   | 196 ± 64.3  | 121 ± 34.0  | 89.6 ± 25.7 | 125 ± 31.6  |
| % of total FA         | 3.09 ± 0.40 | 4.50 ± 1.49 | 5.57 ± 2.35 | 7.03 ± 1.77 | 6.12 ± 1.08 | 4.65 ± 0.82 | 4.02 ± 0.56 | 4.31 ± 0.55 |
| <b>Σn6 PUFA</b> μg/mL | 966 ± 175   | 929 ± 220   | 1027 ± 221  | 1117 ± 230  | 1132 ± 208  | 931 ± 180   | 809 ± 153   | 1062 ± 183  |
| % of total FA         | 34.0 ± 3.83 | 32.7 ± 4.19 | 32.3 ± 3.92 | 31.8 ± 3.97 | 36.2 ± 3.15 | 36.3 ± 2.92 | 37.0 ± 1.95 | 37.0 ± 2.08 |

Levels are shown as concentrations [μg/mL] and as relative concentrations [%] of total fatty acids at baseline (t0), and 2 (t2), 4 (t4), 6 (t6), 8 (t8), 24 (t24), 48 (t48), 72 (t72) hours after single-dose ingestion of echium oil (26 g). All data are shown as mean ± standard deviation (SD). FA, fatty acids; MUFA, monounsaturated fatty acids; n3, omega-3; n6, omega-6; PUFA, polyunsaturated fatty acids; SD, standard deviation; SFA, saturated fatty acids. In plasma, the minor fatty acid C12:0 was not evaluated due to chromatographic interferences.
